# Supplementary material for: Genome-Wide Identification of Pseudomonas aeruginosa Virulence-Related Genes Using a Caenorhabditis elegans Infection Model
Source: PLoS Pathog. 2012 Jul 26;8(7):e1002813. doi: 10.1371/journal.ppat.1002813 (PMC3406104; doi:10.1371/journal.ppat.1002813)
Supplement: Table S2 — Auxotrophic and slow-growing mutants identified in the primary screen for virulence-attenuated mutants. (XLSX) [file ppat.1002813.s015.xlsx]

## Sheet: Sheet1
	note yellow=noticed thin lawn on SK 15/56 scored NOTE ONLY SCORED STARTING FROM PLATE 8.3 ON. ALSO MANY OTHERS HAVE PIGMENT/BORDER ETC. PHENOTYPE
LocusName	PO_PlatePosition96	Well	MutantID	Accession	PAO1 Ortholog	Comment	GeneID	FunctionalClass	FunctionalClassName
PA14_23920	PAMr_nr_mas_01_2	C3	23709	YP_790065.1	PA3108	purF	751	2	Amino acid biosynthesis and metabolism
PA14_36000	PAMr_nr_mas_01_3	A8	24048	YP_791029.1		PAGI-1 (5)	4903	25	Transcriptional regulators
PA14_21050	PAMr_nr_mas_01_3	D4	24202	YP_789828.1	PA3324	putative short chain dehydrogenase	489	20	Putative enzymes
PA14_57770	PAMr_nr_mas_02_3	D1	26315	YP_792792.1	PA4447	hisC1	1908	2	Amino acid biosynthesis and metabolism
PA14_52060	PAMr_nr_mas_03_2	B6	27791	YP_792332.1		overlap of purN and following gene	3338	14	Hypothetical, unclassified, unknown
PA14_70370	PAMr_nr_mas_03_3	D4	28409	YP_793805.1	PA5331	pyrE	3731	18	Nucleotide biosynthesis and metabolism
PA14_64220	PAMr_nr_mas_04_2	E6	29794	YP_793321.1	PA4855	purD	1301	18	Nucleotide biosynthesis and metabolism
PA14_07740	PAMr_nr_mas_04_2	F1	29841	YP_788766.1	PA0593	pdxA	2135	4	Biosynthesis of cofactors, prosthetic groups and carriers
PA14_37550	PAMr_nr_mas_04_2	G3	29899	YP_791154.1	PA2085	putative ring hydroxylating dioxegenase small subunit	4328	5	Carbon compound catabolism
PA14_68610	PAMr_nr_mas_04_3	A4	29990	YP_793665.1	PA5193	putative chaperonin	2567	9	Chaperones & heat shock proteins
PA14_25880	PAMr_nr_mas_04_4	A12	30558	YP_790222.1	PA2951	eftA	2614	12	Energy metabolism
PA14_08340	PAMr_nr_mas_04_4	H11	31022	YP_788819.1	PA0649	trpG	3832	2	Amino acid biosynthesis and metabolism
PA14_17880	PAMr_nr_mas_05_2	F1	31924	YP_789575.1	PA3589	acetyl-CoA acetyltransferase (thiolase)	1571	13	Fatty acid and phospholipid metabolism
PA14_30090	PAMr_nr_mas_05_2	A9	31662	YP_790563.1	PA2631	putative acyltransferase	4634	20	Putative enzymes
PA14_66710	PAMr_nr_mas_05_3	G12	32561	YP_793518.1	PA5049	rpmE	5359	26	Translation, post-translational modification, degradation
PA14_46470	PAMr_nr_mas_05_3	H3	32572	YP_791864.1	PA1375	pdxB	1669	4	Biosynthesis of cofactors, prosthetic groups and carriers
PA14_62910	PAMr_nr_mas_05_3	D4	32277	YP_793220.1	PA4756	carB	52	18	Nucleotide biosynthesis and metabolism
PA14_52050	PAMr_nr_mas_05_3	F4	32404	YP_792331.1	PA0944	purN	3563	18	Nucleotide biosynthesis and metabolism
PA14_15740	PAMr_nr_mas_05_3	G1	32451	YP_789399.1	PA3763	purL	24	18	Nucleotide biosynthesis and metabolism
PA14_05560	PAMr_nr_mas_05_3	G11	32541	YP_788602.1	PA0428	putative ATP-dep RNA helicase, DEAD box	401	24	Transcription, RNA processing and degradation
PA14_12010	PAMr_nr_mas_05_4	C3	32844	YP_789112.1	PA4007	proA	1408	2	Amino acid biosynthesis and metabolism
PA14_51240	PAMr_nr_mas_06_4	B8	34993	YP_792258.1	PA1013	purC	3358	18	Nucleotide biosynthesis and metabolism
PA14_26890	PAMr_nr_mas_07_1	B9	35555	YP_790298.1	PA2876	pyrE	3483	18	Nucleotide biosynthesis and metabolism
PA14_00440	PAMr_nr_mas_07_2	A2	35940	YP_788191.1	PA0035	trpA	3015	2	Amino acid biosynthesis and metabolism
PA14_43670	PAMr_nr_mas_07_3	F3	36736	YP_791640.1	PA1611	putative response regulator hybrid	415	28	Two-component regulatory systems
PA14_23850	PAMr_nr_mas_08_1	G9	37949	YP_790060.1	PA3113	trpE	3736	2	Amino acid biosynthesis and metabolism
PA14_18710	PAMr_nr_mas_08_2	D12	38380	YP_789638.1	PA3527	pyrC	1907	18	Nucleotide biosynthesis and metabolism
PA14_69670	PAMr_nr_mas_08_2	F6	38479	YP_793751.1	PA5277	lysA	1398	2	Amino acid biosynthesis and metabolism
PA14_14680	PAMr_nr_mas_08_2	G1	38519	YP_789314.1	PA3818	inositol-1-monophosphate	2898	1	Adaptation, protection
PA14_05250	PAMr_nr_mas_08_2	G11	38595	YP_788575.1	PA0401	non-catalytic dihydroorotase like protein	1358	18	Nucleotide biosynthesis and metabolism
PA14_73400	PAMr_nr_mas_08_3	A3	38726	YP_794045.1	PA5567	putative GTPase for tRNA modification	1154	26	Translation, post-translational modification, degradation
PA14_05590	PAMr_nr_mas_08_3	F10	39053	YP_788604.1	PA0430	metF	2625	8	Central intermediary metabolism
PA14_66290	PAMr_nr_mas_08_4	H7	39618	YP_793484.1	PA5015	aceA	105	2	Amino acid biosynthesis and metabolism
PA14_08350	PAMr_nr_mas_09_1	E3	39937	YP_788820.1	PA0650	trpD	2010	2	Amino acid biosynthesis and metabolism
PA14_62930	PAMr_nr_mas_09_1	E4	39940	YP_793222.1	PA4758	carA	1643	18	Nucleotide biosynthesis and metabolism
PA14_07740	PAMr_nr_mas_09_2	E11	40435	YP_788766.1	PA0593	pdxA	2135	4	Biosynthesis of cofactors, prosthetic groups and carriers
PA14_12400	PAMr_nr_mas_09_4	C7	41228	YP_789142.1	PA3976	putative thoamin-phosphated pyrophosphorhylase	3878	4	Biosynthesis of cofactors, prosthetic groups and carriers
PA14_05250	PAMr_nr_mas_10_1	E6	41761	YP_788575.1	PA0401	non-catalytic dihydroorotase like protein	1358	18	Nucleotide biosynthesis and metabolism
PA14_06510	PAMr_nr_mas_10_1	A8	41576	YP_788671.1	PA0501	bioF	1530	4	Biosynthesis of cofactors, prosthetic groups and carriers
PA14_66800	PAMr_nr_mas_10_2	A4	41973	YP_793524.1	PA5055	conserved hypothetical	4843	14	Hypothetical, unclassified, unknown
PA14_05560	PAMr_nr_mas_10_2	E9	42207	YP_788602.1	PA0428	putative ATP-dep RNA helicase, DEAD box	401	24	Transcription, RNA processing and degradation
PA14_66600	PAMr_nr_mas_10_3	B2	42535	YP_793507.1	PA5038	aroB	1769	2	Amino acid biosynthesis and metabolism
PA14_66310	PAMr_nr_mas_10_3	F9	42933	YP_793485.1	PA5016	aceF	671	12	Energy metabolism
PA14_00450	PAMr_nr_mas_10_4	F9	43694	YP_788192.1	PA0036	trpB	1401	2	Amino acid biosynthesis and metabolism
PA14_27950	PAMr_nr_mas_11_2	E2	44818	YP_790382.1	PA2797	putative anti anti sigma factor	4438	28	Two-component regulatory systems
PA14_65410	PAMr_nr_mas_11_3	D12	45346	YP_793419.1	PA4951	orn	4039	24	Transcription, RNA processing and degradation
PA14_69270	PAMr_nr_mas_11_4	H7	46254	YP_793718.1	PA5246	putative thioesterase	4432	4	Biosynthesis of cofactors, prosthetic groups and carriers
PA14_19170	PAMr_nr_mas_12_1	H1	47128	YP_789675.1	PA3472	putative lipoprotein	3873	7	Cell wall / LPS / capsule
PA14_70370	PAMr_nr_mas_12_1	A2	46326	YP_793805.1	PA5331	pyrF	3731	18	Nucleotide biosynthesis and metabolism
PA14_04650	PAMr_nr_mas_12_1	C6	46521	YP_788526.1	PA0355	pfpI	4150	26	Translation, post-translational modification, degradation
PA14_64200	PAMr_nr_mas_12_1	F11	46986	YP_793320.1	PA4854	purH	674	18	Nucleotide biosynthesis and metabolism
PA14_52040	PAMr_nr_mas_12_2	G2	47921	YP_792330.1	PA0945	purM	1887	18	Nucleotide biosynthesis and metabolism
PA14_20230	PAMr_nr_mas_12_3	G7	48720	YP_789758.1	PA3391	nosR	271	25	Transcriptional regulators
PA14_34770	PAMr_nr_mas_12_3	C11	48417	YP_790930.1	PA2309	putative ABC transporter periplasmic binding protein	2027	27	Transport of small molecules
PA14_32860	PAMr_nr_mas_12_3	E8	48544	YP_790781.1	PA2455	hypothetical protein	4124	14	Hypothetical, unclassified, unknown
PA14_12020	PAMr_nr_mas_12_3	H3	52612	YP_789113.1	PA4006	nadD	3602	4	Biosynthesis of cofactors, prosthetic groups and carriers
PA14_51780	PAMr_nr_mas_12_3	A9	48244	YP_792307.1	PA0967	ruvB	1940	11	DNA replication, recombination, modification and repair
PA14_08360	PAMr_nr_mas_12_3	G6	48714	YP_788821.1	PA0651	trpC	2981	2	Amino acid biosynthesis and metabolism
PA14_67670	PAMr_nr_mas_12_4	D4	52857	YP_793594.1	PA5124	ntrB 2	1913	28	Two-component regulatory systems
PA14_14610	PAMr_nr_mas_12_4	A9	52713	YP_789310.1	PA3822	putative preprotein translocase	5027	19	Protein secretion/export apparatus
PA14_41240	PAMr_nr_mas_12_4	E7	52957	YP_791442.1	PA1801	clpP	3668	9	Chaperones & heat shock proteins
PA14_05460	PAMr_nr_mas_12_4	A2	52689	YP_788594.1	PA0420	bioA	862	4	Biosynthesis of cofactors, prosthetic groups and carriers
PA14_05260	PAMr_nr_mas_12_4	A3	52690	YP_788576.1	PA0402	pyrB	2156	18	Nucleotide biosynthesis and metabolism
PA14_06570	PAMr_nr_mas_12_4	C11	52821	YP_788674.1	PA0504	bioD	3613	4	Biosynthesis of cofactors, prosthetic groups and carriers
PA14_68360	PAMr_nr_mas_13_1	E6	53600	YP_793645.1	PA5174	putative beta ketoacyl synthase	427	13	Fatty acid and phospholipid metabolism
PA14_54290	PAMr_nr_mas_13_1	H5	53798	YP_792511.1	PA0773	pdxJ	3309	4	Biosynthesis of cofactors, prosthetic groups and carriers
PA14_05460	PAMr_nr_mas_13_1	D2	53467	YP_788594.1	PA0420	bioA	862	4	Biosynthesis of cofactors, prosthetic groups and carriers
PA14_05620	PAMr_nr_mas_13_3	E2	54793	YP_788606.1	PA0432	sahH	906	8	Central intermediary metabolism
PA14_16090	PAMr_nr_mas_13_3	H1	55048	YP_789428.1	PA3735	thrC	934	2	Amino acid biosynthesis and metabolism
PA14_29290	PAMr_nr_mas_13_3	H12	55151	YP_790502.1	PA2693	putative longchain acyl coA thioester	4303	13	Fatty acid and phospholipid metabolism
PA14_62830	PAMr_nr_mas_13_4	B4	55256	YP_793212.1	PA4748	tpiA	3276	8	Central intermediary metabolism
PA14_52700	PAMr_nr_mas_14_1	D1	56181	YP_792380.1	PA0896	aruF	2071	2	Amino acid biosynthesis and metabolism
PA14_06540	PAMr_nr_mas_14_1	H12	56570	YP_788673.1	PA0503	bioC	2882	4	Biosynthesis of cofactors, prosthetic groups and carriers
PA14_62830	PAMr_nr_mas_14_1	D6	56206	YP_793212.1	PA4748	tpiA	3276	8	Central intermediary metabolism
PA14_05620	PAMr_nr_mas_14_2	B11	56708	YP_788606.1	PA0432	sahH	906	8	Central intermediary metabolism
PA14_24640	PAMr_nr_mas_14_2	C1	56738	YP_790121.1	PA3050	pyrD	2054	18	Nucleotide biosynthesis and metabolism
PA14_70370	PAMr_nr_mas_14_4	G7	28409	YP_793805.1	PA5331	pyrE	3731	18	Nucleotide biosynthesis and metabolism
PA14_15740	PAMr_nr_mas_15_1	A7	29716	YP_789399.1	PA3763	purL	24	18	Nucleotide biosynthesis and metabolism
PA14_65410	PAMr_nr_mas_15_1	H11	36369	YP_793419.1	PA4951	orn	4039	24	Transcription, RNA processing and degradation
PA14_45710	PAMr_nr_mas_15_2	A7	37135	YP_791802.1	PA1450	conserved hypothetical	1361	14	Hypothetical, unclassified, unknown
PA14_66600	PAMr_nr_mas_15_2	B6	38358	YP_793507.1	PA5038	aroB	1769	2	Amino acid biosynthesis and metabolism
PA14_62580	PAMr_nr_mas_15_2	F11	41553	YP_793193.1	PA4729	panB	3061	4	Biosynthesis of cofactors, prosthetic groups and carriers
PA14_24640	PAMr_nr_mas_15_3	G5	55648	YP_790121.1	PA3050	pyrD	2054	18	Nucleotide biosynthesis and metabolism
PA14_71600	PAPho_nr_mas_01_1	D8	570	YP_793900.1	PA5425	purK	1830	18	Nucleotide biosynthesis and metabolism
PA14_65250	ExMr_nr_mas_01_1	E3	23029	YP_793407.1	PA4939	putative ATP phosphoribosyltransferase	1548	27	Transport of small molecules
PA14_71620	ExMr_nr_mas_01_1	D8	22699	YP_793901.1	PA5426	purE	4383	18	Nucleotide biosynthesis and metabolism
TOTAL 86
added 8.2 G11
